# Supplementary material
Source: PubMed Central journal article supplement (PMC10832608)
Supplement: NIHMS1960076-supplement-S_I-III_Tables_and_S_F1-2.pdf [file NIHMS1960076-supplement-S_I-III_Tables_and_S_F1-2.pdf]

Supplementary Table I. tRF5s in CSF

|                         | baseMean  |
|-------------------------|-----------|
| tRF5-Ala-AGC-4-1        | 150.90594 |
| tRF5-Ala-CGC-2-1        | 145.8021  |
| tRF5-Ala-CGC-3-1        | 150.08928 |
| tRF5-Ala-TGC-3-2        | 148.25036 |
| tRF5-Glu-CTC-2-1        | 58682.005 |
| tRF5-Glu-CTC-3-1        | 18.847998 |
| tRF5-Glu-TTC-1-2        | 977.3557  |
| tRF5-Glu-TTC-2-2        | 2160.5129 |
| tRF5-Glu-TTC-8-1        | 1504.0403 |
| tRF5-Glu-TTC-9-1        | 1772.6891 |
| tRF5-Glu-TTC-chr1-138   | 946.36984 |
| tRF5-Gly-CAC-chr1-94    | 22.995849 |
| tRF5-Gly-CCC-2-2        | 293.48529 |
| tRF5-Gly-CCC-6-1        | 160.00458 |
| tRF5-Gly-CCC-chr1-135   | 515.04147 |
| tRF5-Gly-CCC-chr1-2     | 161.44766 |
| tRF5-Gly-CCC-chr1-33    | 128.25095 |
| tRF5-Gly-GCC-1-5        | 14911.068 |
| tRF5-Gly-GCC-3-1        | 187935.24 |
| tRF5-Gly-GCC-4-1        | 373.11248 |
| tRF5-Gly-TCC-2-6        | 137.56093 |
| tRF5-Gly-TCC-3-1        | 57.334476 |
| tRF5-His-GTG-1-8        | 978.2619  |
| tRF5-His-GTG-2-1        | 136.44714 |
| tRF5-iMet-CAT-1-8       | 55.357909 |
| tRF5-Leu-AAG            | 2208.033  |
| tRF5-Leu-CAG-2-1        | 199.3295  |
| tRF5-Leu-TAG-2-1        | 22.887193 |
| tRF5-Lys-CTT-11-1       | 110.79453 |
| tRF5-Lys-CTT-14-1       | 68.582885 |
| tRF5-Lys-CTT-16-1       | 110.55262 |
| tRF5-Lys-CTT-2-5        | 1884.2444 |
| tRF5-Lys-CTT-5-1        | 167.7888  |
| tRF5-Lys-CTT-6-1        | 1233.3504 |
| tRF5-Lys-CTT-7-1        | 116.04969 |
| tRF5-Lys-TTT-2-1        | 10.049157 |
| tRF5-Lys-TTT-4-1        | 88.569013 |
| tRF5-Lys-TTT-5-1        | 348.80487 |
| tRF5-Lys-TTT-6-1        | 91.664387 |
| tRF5-nm-Tyr-GTA-chr14-8 | 23.321725 |
| tRF5-Pro-AGG            | 1316.0711 |
| tRF5-SeC-TCA-2-1        | 216.92775 |
| tRF5-Ser-GCT-4-3        | 16.196982 |
| tRF5-Ser-TGA-2-1        | 840.63498 |
| tRF5-Thr-CGT-6-1        | 47.73776  |
| tRF5-Tyr-GTA-11-1       | 16.718652 |
| tRF5-Und-NNN-4-1        | 127.40021 |
| tRF5-Val-AAC-2-1        | 190.13502 |
| tRF5-Val-CAC-2-1        | 417.81343 |
| tRF5-Val-CAC-3-1        | 75.033558 |
| tRF5-Val-CAC-6-1        | 19.370887 |
| tRF5-Val-CAC-7-1        | 50.499703 |
| tRF5-Val-CAC-8-1        | 27.648412 |
| tRF5-Val-CAC-chr1-93    | 7131.9227 |
| tRF5-Val-TAC-1-2        | 55.508517 |
| tRF5-Val-TAC-2-1        | 27.557126 |
| tRF5-Val-TAC-4-1        | 42.701139 |

Supplementary Table II. tRF5s in serum

|                       | baseMean   |
|-----------------------|------------|
| tRF5-Gly-GCC-3-1      | 22772.5565 |
| tRF5-Glu-CTC-2-1      | 4774.702   |
| tRF5-Gly-GCC-1-5      | 2649.23271 |
| tRF5-Glu-TTC-9-1      | 308.407606 |
| tRF5-SeC-TCA-2-1      | 273.028417 |
| tRF5-Lys-CTT-6-1      | 169.133264 |
| tRF5-Gly-CCC-chr1-135 | 74.4724899 |
| tRF5-Glu-TTC-chr1-138 | 74.1945657 |
| tRF5-Glu-TTC-8-1      | 66.1942701 |
| tRF5-Pro-AGG          | 56.2783515 |
| tRF5-Lys-CTT-2-5      | 46.1853753 |
| tRF5-Gly-GCC-4-1      | 41.7669172 |
| tRF5-Glu-TTC-2-2      | 41.1825228 |
| tRF5-Gly-CCC-6-1      | 37.5471038 |
| tRF5-Gly-CCC-2-2      | 37.0879382 |
| tRF5-Gly-CCC-chr1-33  | 31.736231  |
| tRF5-Gly-CCC-chr1-2   | 26.5472214 |
| tRF5-His-GTG-1-8      | 16.8115199 |
| tRF5-Lys-TTT-6-1      | 15.2488906 |
| tRF5-Lys-TTT-5-1      | 14.3527658 |
| tRF5-Glu-TTC-1-2      | 13.4786859 |
| tRF5-Lys-TTT-4-1      | 12.2951314 |
| tRF5-Leu-AAG          | 9.50632559 |
| tRF5-Lys-CTT-11-1     | 8.91468219 |
| tRF5-Ala-CGC-2-1      | 8.88383544 |
| tRF5-nm-Tyr-GTA-chr14 | 8.60655315 |
| tRF5-Gly-CCC-7-1      | 8.27437544 |
| tRF5-Ser-TGA-2-1      | 7.58145221 |
| tRF5-Ala-TGC-3-2      | 6.83385542 |
| tRF5-Val-CAC-chr1-93  | 6.45580564 |
| tRF5-Lys-CTT-7-1      | 5.87455399 |
| tRF5-Ala-AGC-4-1      | 5.47630926 |
| tRF5-Thr-CGT-6-1      | 4.79289849 |
| tRF5-Val-CAC-2-1      | 4.28938311 |
| tRF5-iMet-CAT-1-8     | 4.08140927 |
| tRF5-Und-NNN-4-1      | 3.07484388 |
| tRF5-Lys-CTT-16-1     | 2.98183773 |
| tRF5-Gly-TCC-3-1      | 1.41144735 |
| tRF5-Ser-GCT-4-3      | 1.2733108  |

**Supplementary Table III.** Clinical information of serum samples

| samples # | Age | CDR | MMSE | Gender | clinical diagnosis |
|-----------|-----|-----|------|--------|--------------------|
| 1         | 60  | 0.5 | 25   | M      | AD                 |
| 2         | 62  | 2   | 17   | M      | AD                 |
| 3         | 65  | 3   | 4    | M      | AD                 |
| 4         | 61  | 1   | 15   | M      | AD                 |
| 5         | 63  | 2   | 13   | M      | AD                 |
| 6         | 58  | 0.5 | 19   | F      | AD                 |
| 7         | 61  | 2   | 6    | F      | AD                 |
| 8         | 56  | 1   | 22   | F      | AD                 |
| 9         | 61  | 3   | 0    | F      | AD                 |
| 10        | 60  | 1   | 13   | F      | AD                 |
| 11        | 61  | 0   | 30   | M      | normal             |
| 12        | 64  | 0   | 30   | M      | normal             |
| 13        | 60  | 0   | 30   | M      | normal             |
| 14        | 61  | 0   | 30   | F      | normal             |
| 15        | 61  | 0   | 29   | F      | normal             |
| 16        | 59  | 0   | 29   | F      | normal             |
| 17        | 77  | 0.5 | 29   | M      | AD                 |
| 18        | 83  | 1   | 22   | M      | AD                 |
| 19        | 68  | 0.5 | 26   | M      | MCI                |
| 20        | 70  | 0.5 | 24   | M      | AD                 |
| 21        | 67  | 0.5 | 28   | M      | MCI                |
| 22        | 72  | 1   | 20   | M      | AD                 |
| 23        | 73  | 1   | 16   | M      | AD                 |
| 24        | 74  | 1   | 21   | F      | AD                 |
| 25        | 75  | 2   | 14   | F      | AD                 |
| 26        | 80  | 0.5 | 24   | F      | AD                 |
| 27        | 83  | 1   | 15   | F      | AD                 |
| 28        | 76  | 1   | 23   | F      | MCI                |
| 29        | 77  | 1   | 27   | F      | AD                 |
| 30        | 79  | 0.5 | 27   | F      | MCI                |
| 31        | 80  | 1   | 26   | F      | MCI                |
| 32        | 77  | 0   | 30   | M      | normal             |
| 33        | 80  | 0   | 30   | M      | normal             |
| 34        | 71  | 0   | 30   | M      | normal             |
| 35        | 73  | 0   | 30   | M      | normal             |
| 36        | 68  | 0   | 30   | M      | normal             |
| 37        | 73  | 0   | 29   | M      | normal             |
| 38        | 79  | 0   | 29   | F      | normal             |
| 39        | 77  | 0   | 30   | F      | normal             |
| 40        | 78  | 0   | 29   | F      | normal             |
| 41        | 74  | 0   | 30   | F      | normal             |
| 42        | 76  | 0   | 30   | F      | normal             |
| 43        | 61  | 1   | 22   | M      | AD                 |
| 44        | 64  | 2   | 9    | M      | AD                 |

|    |    |     |    |   |        |
|----|----|-----|----|---|--------|
| 45 | 59 | 1   | 19 | M | AD     |
| 46 | 60 | 1   | 19 | M | AD     |
| 47 | 62 | 1   | 17 | M | AD     |
| 48 | 57 | 1   | 20 | F | AD     |
| 49 | 58 | 1   | 18 | F | AD     |
| 50 | 59 | 1   | 10 | F | AD     |
| 51 | 60 | 2   | 9  | F | AD     |
| 52 | 59 | 1   | 19 | F | AD     |
| 53 | 60 | 1   | 13 | F | AD     |
| 54 | 62 | 3   | 4  | F | AD     |
| 55 | 63 | 3   | 2  | F | AD     |
| 56 | 62 | 0   | 29 | M | normal |
| 57 | 65 | 0   | 29 | M | normal |
| 58 | 60 | 0   | 30 | M | normal |
| 59 | 61 | 0   | 29 | M | normal |
| 60 | 62 | 0   | 30 | M | normal |
| 61 | 63 | 0   | 30 | M | normal |
| 62 | 64 | 0   | 28 | M | normal |
| 63 | 65 | 0   | 30 | M | normal |
| 64 | 56 | 0   | 30 | M | normal |
| 65 | 57 | 0   | 30 | M | normal |
| 66 | 58 | 0   | 30 | M | normal |
| 67 | 59 | 0   | 29 | M | normal |
| 68 | 58 | 0   | 30 | F | normal |
| 69 | 62 | 0   | 30 | F | normal |
| 70 | 63 | 0   | 30 | F | normal |
| 71 | 64 | 0   | 29 | F | normal |
| 72 | 65 | 0   | 29 | F | normal |
| 73 | 62 | 0   | 30 | F | normal |
| 74 | 62 | 0   | 30 | F | normal |
| 75 | 63 | 0   | 30 | F | normal |
| 76 | 64 | 0   | 29 | F | normal |
| 77 | 65 | 0   | 29 | F | normal |
| 78 | 78 | 1   | 30 | M | AD     |
| 79 | 79 | 0.5 | 29 | M | AD     |
| 80 | 82 | 1   | 23 | M | AD     |
| 81 | 82 | 0.5 | 20 | M | AD     |
| 82 | 84 | 0.5 | 20 | M | AD     |
| 83 | 85 | 1   | 17 | M | AD     |
| 84 | 86 | 2   | 12 | M | AD     |
| 85 | 88 | 3   | 8  | M | AD     |
| 86 | 81 | 1   | 20 | F | AD     |
| 87 | 82 | 0.5 | 20 | F | AD     |
| 88 | 85 | 2   | 5  | F | AD     |
| 89 | 75 | 0   | 29 | M | normal |
| 90 | 76 | 0   | 30 | M | normal |
| 91 | 78 | 0   | 29 | M | normal |

|     |    |     |    |   |        |
|-----|----|-----|----|---|--------|
| 92  | 79 | 0   | 29 | M | normal |
| 93  | 72 | 0   | 30 | M | normal |
| 94  | 74 | 0   | 30 | M | normal |
| 95  | 66 | 0   | 29 | M | normal |
| 96  | 67 | 0   | 29 | M | normal |
| 97  | 69 | 0   | 29 | M | normal |
| 98  | 70 | 0   | 30 | M | normal |
| 99  | 71 | 0   | 30 | M | normal |
| 100 | 72 | 0   | 30 | M | normal |
| 101 | 71 | 0   | 29 | F | normal |
| 102 | 71 | 0   | 30 | F | normal |
| 103 | 72 | 0   | 29 | F | normal |
| 104 | 73 | 0   | 29 | F | normal |
| 105 | 77 | 0   | 30 | F | normal |
| 106 | 78 | 0   | 30 | F | normal |
| 107 | 68 | 0.5 | 29 | F | normal |
| 108 | 66 | 0   | 30 | F | normal |
| 109 | 67 | 0   | 30 | F | normal |
| 110 | 68 | 0   | 30 | F | normal |
| 111 | 69 | 0   | 30 | F | normal |
| 112 | 66 | 0.5 | 27 | M | MCI    |
| 113 | 68 | 0.5 | 29 | M | MCI    |
| 114 | 69 | 0.5 | 28 | M | MCI    |
| 115 | 70 | 0.5 | 24 | M | MCI    |
| 116 | 60 | 0.5 | 24 | M | MCI    |
| 117 | 61 | 0.5 | 22 | M | AD     |
| 118 | 62 | 1   | 15 | M | AD     |
| 119 | 63 | 1   | 17 | M | AD     |
| 120 | 76 | 0.5 | 28 | F | MCI    |

**A**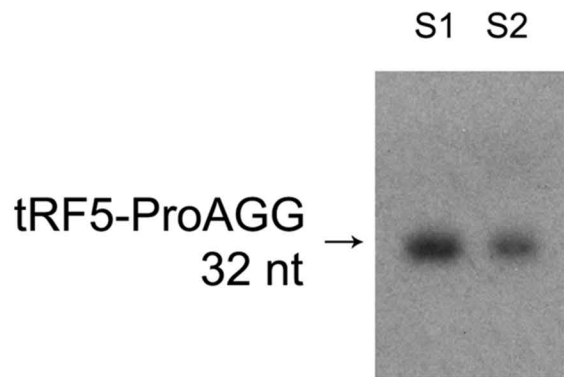**B**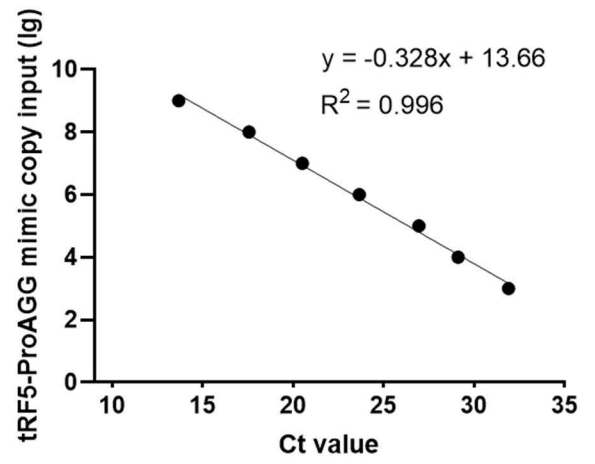**S. Figure 1**

# Serum

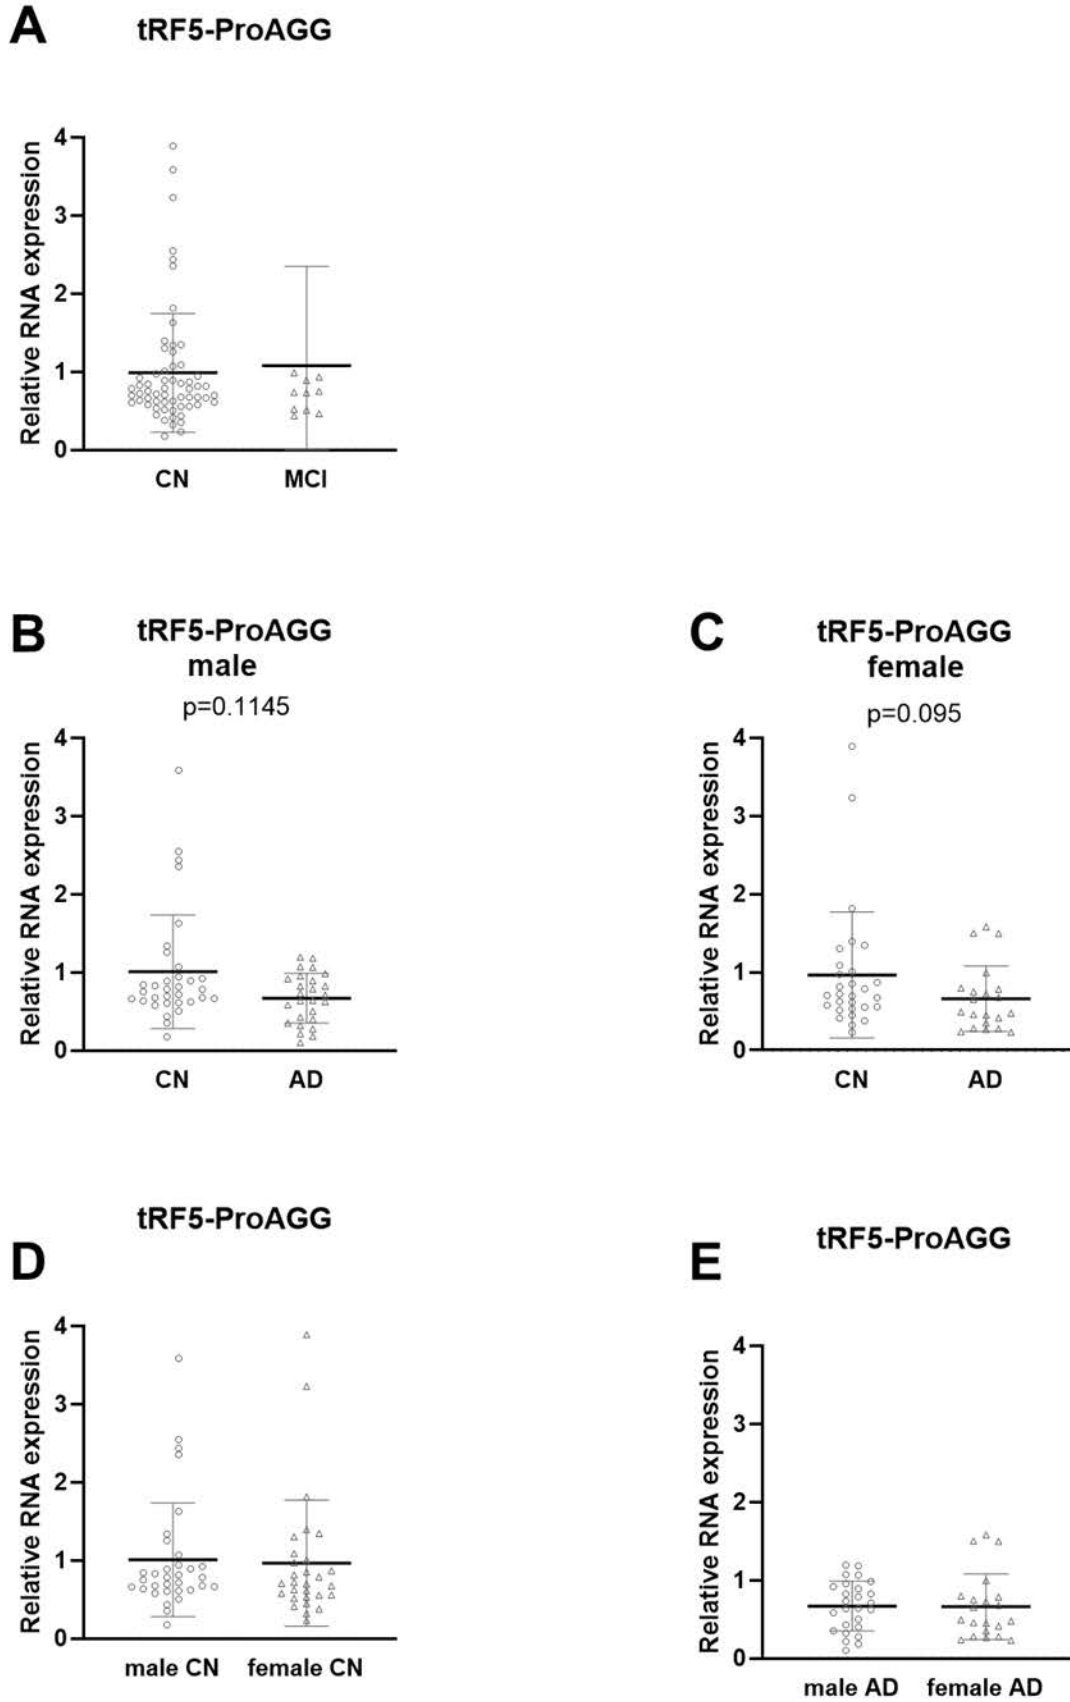

S. Figure 2
